# Supplementary material for: In situ formed methyl-co-(bis-R) silsesquioxane based polymer networks with solvent controlled pore size distributions and high surface areas
Source: Royal Society of Chemistry journal article supplement (doi:10.1039/c9qm00748b), 2020-01-01
Supplement: c9qm00748b1.xlsx [file c9qm00748b1.xlsx]

## Sheet: Sheet1
33N Mesopore : SQ : dV/dW Volume	green line	Sample: standard reaction in Dichloromethane
Pore Width (Å)	dV/dW Pore Volume (cm³/g·Å)	data*weight		Weighted Mean		Data ordered	Weights	Sum of Weights	Standardized weight	sum of standardized weights before this element	sum of standardized weights after this element	Meets median criteria	copy of data ordered for vlookup function	Weighted Median
15.9052	0.0307995	0.489872		33.5632		15.9052	0.0307995	0.153298	0.200913	0	0.799087	FALSE	15.9052	21.6239
17.1561	0.0167728	0.287756				17.1561	0.0167728		0.109413	0.200913	0.689674	FALSE	17.1561
18.5858	0.0141819	0.263582				18.5858	0.0141819		0.0925121	0.310326	0.597162	FALSE	18.5858
20.0155	0.0112071	0.224316				20.0155	0.0112071		0.0731067	0.402838	0.524055	FALSE	20.0155
21.6239	0.00946243	0.204615				21.6239	0.00946243		0.0617258	0.475945	0.46233	TRUE	21.6239
23.411	0.00998579	0.233777				23.411	0.00998579		0.0651398	0.53767	0.39719	FALSE	23.411
25.198	0.0101534	0.255845				25.198	0.0101534		0.0662331	0.60281	0.330957	FALSE	25.198
27.3426	0.0107306	0.293403				27.3426	0.0107306		0.0699984	0.669043	0.260958	FALSE	27.3426
29.4871	0.00767693	0.22637				29.4871	0.00767693		0.0500785	0.739042	0.21088	FALSE	29.4871
31.8103	0.00549697	0.17486				31.8103	0.00549697		0.0358581	0.78912	0.175022	FALSE	31.8103
34.3122	0.00430483	0.147708				34.3122	0.00430483		0.0280815	0.824978	0.14694	FALSE	34.3122
36.9929	0.00217576	0.0804877				36.9929	0.00217576		0.014193	0.85306	0.132747	FALSE	36.9929
40.0309	0.00187752	0.0751588				40.0309	0.00187752		0.0122475	0.867253	0.1205	FALSE	40.0309
43.2477	0.00208766	0.0902865				43.2477	0.00208766		0.0136183	0.8795	0.106881	FALSE	43.2477
46.6432	0.00207859	0.0969521				46.6432	0.00207859		0.0135592	0.893119	0.0933222	FALSE	46.6432
50.3961	0.00188393	0.0949427				50.3961	0.00188393		0.0122893	0.906678	0.0810328	FALSE	50.3961
54.3277	0.00148928	0.0809092				54.3277	0.00148928		0.00971494	0.918967	0.0713179	FALSE	54.3277
58.7954	0.00103126	0.0606333				58.7954	0.00103126		0.00672716	0.928682	0.0645907	FALSE	58.7954
63.4419	0.000647281	0.0410647				63.4419	0.000647281		0.00422237	0.935409	0.0603683	FALSE	63.4419
68.4458	0.000617333	0.0422539				68.4458	0.000617333		0.00402702	0.939632	0.0563413	FALSE	68.4458
73.9858	0.000557891	0.041276				73.9858	0.000557891		0.00363926	0.943659	0.052702	FALSE	73.9858
79.8832	0.000638	0.0509655				79.8832	0.000638		0.00416183	0.947298	0.0485402	FALSE	79.8832
86.3167	0.000806567	0.0696202				86.3167	0.000806567		0.00526144	0.95146	0.0432788	FALSE	86.3167
93.1077	0.000678455	0.0631694				93.1077	0.000678455		0.00442573	0.956721	0.0388531	FALSE	93.1077
100.613	0.000520096	0.0523284				100.613	0.000520096		0.00339272	0.961147	0.0354603	FALSE	100.613
108.655	0.000347627	0.0377714				108.655	0.000347627		0.00226766	0.96454	0.0331927	FALSE	108.655
117.233	0.000203242	0.0238267				117.233	0.000203242		0.0013258	0.966807	0.0318669	FALSE	117.233
126.526	0.000344261	0.043558				126.526	0.000344261		0.0022457	0.968133	0.0296212	FALSE	126.526
136.713	0.00039822	0.0544419				136.713	0.00039822		0.00259769	0.970379	0.0270235	FALSE	136.713
147.614	0.00032131	0.0474299				147.614	0.00032131		0.00209598	0.972977	0.0249275	FALSE	147.614
159.409	0.000249402	0.0397569				159.409	0.000249402		0.00162691	0.975072	0.0233006	FALSE	159.409
172.097	0.00038852	0.0668631				172.097	0.00038852		0.00253441	0.976699	0.0207662	FALSE	172.097
185.858	0.000413613	0.0768733				185.858	0.000413613		0.0026981	0.979234	0.0180681	FALSE	185.858
200.691	0.000352976	0.0708391				200.691	0.000352976		0.00230255	0.981932	0.0157655	FALSE	200.691
216.596	0.000281649	0.061004				216.596	0.000281649		0.00183727	0.984234	0.0139283	FALSE	216.596
233.931	0.000223846	0.0523645				233.931	0.000223846		0.0014602	0.986072	0.0124681	FALSE	233.931
252.517	0.000160476	0.0405229				252.517	0.000160476		0.00104682	0.987532	0.0114212	FALSE	252.517
272.711	0.000101236	0.0276082				272.711	0.000101236		0.000660388	0.988579	0.0107609	FALSE	272.711
294.513	0.000112868	0.0332411				294.513	0.000112868		0.000736266	0.989239	0.0100246	FALSE	294.513
317.924	0.000150964	0.0479951				317.924	0.000150964		0.000984776	0.989975	0.00903981	FALSE	317.924
343.301	0.00020918	0.0718117				343.301	0.00020918		0.00136453	0.99096	0.00767528	FALSE	343.301
370.644	0.000212221	0.0786584				370.644	0.000212221		0.00138437	0.992325	0.00629091	FALSE	370.644
400.309	0.00022065	0.0883282				400.309	0.00022065		0.00143935	0.993709	0.00485155	FALSE	400.309
432.298	0.000164211	0.0709881				432.298	0.000164211		0.00107119	0.995148	0.00378036	FALSE	432.298
466.789	0.000149306	0.0696944				466.789	0.000149306		0.00097396	0.99622	0.0028064	FALSE	466.789
503.961	0.000161952	0.0816175				503.961	0.000161952		0.00105645	0.997194	0.00174995	FALSE	503.961
544.171	9.69568e-05	0.0527611				544.171	9.69568e-05		0.000632473	0.99825	0.00111748	FALSE	544.171
587.597	4.26852e-05	0.0250817				587.597	4.26852e-05		0.000278446	0.998883	0.000839032	FALSE	587.597
634.419	2.14568e-05	0.0136126				634.419	2.14568e-05		0.000139968	0.999161	0.000699064	FALSE	634.419
684.994	2.95404e-06	0.0020235				684.994	2.95404e-06		1.92699e-05	0.999301	0.000679794	FALSE	684.994
739.679	0	0				739.679	0		0	0.99932	0.000679794	FALSE	739.679
798.653	0	0				798.653	0		0	0.99932	0.000679794	FALSE	798.653
862.452	0	0				862.452	0		0	0.99932	0.000679794	FALSE	862.452
931.255	0	0				931.255	0		0	0.99932	0.000679794	FALSE	931.255
1005.6	0	0				1005.6	0		0	0.99932	0.000679794	FALSE	1005.6
1085.66	1.34346e-05	0.0145854				1085.66	1.34346e-05		8.76372e-05	0.99932	0.000592157	FALSE	1085.66
1172.33	5.5456e-05	0.0650127				1172.33	5.5456e-05		0.000361753	0.999408	0.000230403	FALSE	1172.33
1265.8	3.5048e-05	0.0443638				1265.8	3.5048e-05		0.000228627	0.99977	1.7765e-06	FALSE	1265.8
1366.77	2.72334e-07	0.000372218				1366.77	2.72334e-07		1.7765e-06	0.999998	0	FALSE	1366.77
1475.96	0	0				1475.96	0		0	1	0	FALSE	1475.96
1593.55	0	0				1593.55	0		0	1	0	FALSE	1593.55
